# Supplementary material for: Protocol of a randomised controlled trial characterising the immune responses induced by varicella-zoster virus (VZV) vaccination in healthy Kenyan women: setting the stage for a potential VZV-based HIV vaccine
Source: PubMed Central journal article supplement — BMJ Open. 2017 Sep 21;7(9):e017391. doi: 10.1136/bmjopen-2017-017391 (PMC5623463; doi:10.1136/bmjopen-2017-017391), 2017-09-21
Supplement: bmjopen-2017-017391supp001.pdf [file bmjopen-2017-017391supp001.pdf]

1 **Title: Protocol of a randomized controlled trial characterising the immune**  
 2 **responses induced by varicella-zoster virus (VZV) vaccination in healthy**  
 3 **Kenyan women: setting the stage for a potential VZV-based HIV vaccine**

4

5 Catia T. Perciani, Walter Jaoko, Sharon Walmsley, Bashir Farah, Salaheddin M.  
 6 Mahmud, Mario Ostrowski, Omu Anzala, KAVI-ICR Team, Kelly S. MacDonald

7

8 **SUPPLEMENTARY MATERIAL**

9

10 **Table 1S. KAVI-VZV-001 Laboratory Screening Tests**

| Test for                     | Type of Sample | Method                                                                                 |
|------------------------------|----------------|----------------------------------------------------------------------------------------|
| HIV-1 and HIV-2              | Blood (serum)  | HIV RAPIDS (Determine and UniGold) BIOELISA<br>HIV1+2 Ag/Ab                            |
| VZV antibodies               | Blood (plasma) | VIDAS <sup>®</sup> Varicella-Zoster IgG test kit                                       |
| Hepatitis B                  | Blood (plasma) | BIOELISA HBsAg V3.0                                                                    |
| Hepatitis C                  | Blood (plasma) | BIOELISA HCV V4.0                                                                      |
| Pregnancy                    | Urine          | hCG-Combo Test                                                                         |
| Urinalysis                   | Urine          | Siemens Multistix 10 SG                                                                |
| Syphilis                     | Blood (plasma) | Rapid Plasma Reagin Test for Syphilis Screening                                        |
| Vaginal trichomoniasis       | Vaginal Swab   | Wet prep showing <i>Trichomonas vaginalis</i> pH>4 or in<br>pouch TV culture system    |
| Bacterial vaginosis          | Vaginal Swab   | Gram stain-score by Nugent criteria pH>4                                               |
| Vaginal candidiasis          | Vaginal Swab   | KoH prep or Gram stain, showing yeast, low pH<4                                        |
| <i>Neisseria gonorrhoeae</i> | Vaginal Swab   | Multiplex PCR - Xpert <sup>®</sup> CT/NG test (Cepheid)                                |
| <i>Chlamydis trachomatis</i> | Vaginal Swab   | Multiplex PCR - Xpert <sup>®</sup> CT/NG test (Cepheid)                                |
| Haematology                  | Blood          | Complete blood count (haemoglobin, hematocrit,<br>erythrocytes, leukocytes, platelets) |
| Coagulation                  | Blood (plasma) | INR                                                                                    |

11

12 **SAMPLE COLLECTION AND MANAGEMENT**

13 **Blood Collection and processing**

14 BD Vacutainer<sup>®</sup> SST, sodium citrate, EDTA, or sodium heparin tubes are used for  
15 blood collection. Plasma isolated from EDTA and sodium heparin tubes are stored at  
16 -80°C for future analysis. Peripheral Blood Mononuclear Cells (PBMCs) are isolated  
17 by gradient centrifugation using Histopaque<sup>®</sup>- 1077 Hybri-Max (Sigma-Aldrich) from  
18 blood collected with sodium heparin tubes. A fraction of the PBMCs isolated are  
19 analyzed fresh in the laboratory and another fraction is stored at -150°C for future  
20 analysis.

21

## 22 **Cervico-vaginal specimens collection and processing**

23 Participants are instructed to refrain from sexual intercourse, douching, or vaginal or  
24 rectal insertion of any products for at least 48 hours prior to the collection of  
25 specimens. If a participant has not complied with the instructions above, samples are  
26 still collected and the time of last sexual activity or details about the product and time  
27 of use recorded on the Case Report Form (CRF) and accounted for during analysis. If  
28 a participant is experiencing cervical bleeding, the sample collections are re-  
29 scheduled and the cause of bleeding assessed and managed appropriately by the trial  
30 physician. Cervico-vaginal secretions are collected using a flexible plastic cup  
31 (Softcup<sup>™</sup>, Instead) which is inserted into the vagina and removed after 20 minutes.  
32 The secretions collected in the softcup are diluted six fold using a protease inhibitor  
33 solution (Calbiochem) and stored at -80°C. Cervical cells are collected using a  
34 cytobrush (Digene<sup>®</sup>, Qiagen) which is gently inserted in the cervical canal and turned  
35 360° one time to collect the cells. Two cytobrushes are collected and placed in a tube  
36 containing supplemented R10 (RPMI medium [Sigma] containing 10<sup>5</sup> units/L penicillin  
37 [Sigma], 100 mg/L streptomycin [Sigma], 1.25 mg/L amphotericin [Sigma], 50 mg/L

38 gentamycin [Sigma] and enriched with 10% Fetal Bovine Serum [Sigma]). Cervical  
39 cells isolated from the cytobrushes are used fresh for cytometric analysis.

40

#### 41 **Rectal Specimens collection and processing**

42 Rectal secretions and rectal biopsies are collected with a proctoscope in place. Rectal  
43 secretions are collected using two sponges (Merocel®, Medtronic) pre-moistened with  
44 50 µL of PBS which are inserted in the rectal cavity (one at the time), left in contact to  
45 the mucosal surface for 5 minutes and then transferred to the top chamber of the  
46 spin-X tube filter 0.22 µm (Costar) containing 300 µL of protease inhibitor solution  
47 (Calbiochem). Rectal secretions are extracted from the chamber by centrifugation and  
48 stored at -80°C. Rectal biopsies (10 punches) are collected using a Sarrat disposable  
49 forceps (STE1500, Stericom) and placed in a tube containing supplemented R10.  
50 Nine out of 10 rectal punch biopsies are digested using collagenase type II (Sigma)  
51 and used fresh for cytometric analysis. One punch biopsy is stored in Cryomatrix  
52 (ThermoScientific) at -150°C for future analysis.

53

#### 54 **Saliva collection and processing**

55 Participants are instructed to refrain from eating for 2h and drinking for 30 min prior to  
56 saliva collection. Two sponges (Salivette®, Sarstedt) (one at the time) are inserted at  
57 one side of the mouth (close to the parotid duct gland) for 5 min and then removed,  
58 placed into a tube and kept on ice. Saliva is extracted from the sponges by  
59 centrifugation, diluted two fold using protease inhibitor solution (Calbiochem) and  
60 stored at -80°C.

61

## 62 **LABORATORY MEASUREMENTS**

### 63 **Cellular Immune Activation**

64 Multicolor flow cytometric analysis are performed on mononuclear cells isolated from  
65 blood, cervix and rectum and stained using pre-determined concentrations of the  
66 following antibodies: LIVE/DEAD Far Red Cell Stain Kit (Invitrogen); anti-CD3  
67 APCeFluor780 (clone SK7), anti-HLA-DR FITC (clone L243), anti-CD49d PE (clone  
68 9F10), anti-Ki67 PECy7 (clone 20Raj1) (eBioscience); anti-CD4 BV510 (clone SK3),  
69 anti-CD38 PE-CF594 (clone HIT2), anti-CCR5 BV421 (clone 2D7) (BD Horizon); anti-  
70 CD69 (clone FN50), and anti-Integrin  $\beta$ 7 PECy5 (Clone FIB504) (BD Pharmingen).  
71 Samples are acquired on an LSRII flow cytometer driven by the DiVa software  
72 package (BD Biosciences). Analysis of the acquired data is performed using FlowJo  
73 software (Tree Star, Inc.).

74

### 75 **VZV-specific Cellular Responses**

76 Mononuclear cells isolated from blood, cervix and rectum are stimulated with a pool of  
77 peptides comprised of overlapping 15-mer peptides derived from VZV glycoprotein E  
78 (mixture of 124 individual peptides at 0.4  $\mu$ g of individual peptide/test) and VZV Open  
79 Reading Frame 4 (ORF4) protein (mixture of 88 peptides, 0.35  $\mu$ g of individual  
80 peptide/test) (Mimotopes, Victoria, Australia) in presence of 1  $\mu$ g/mL of anti-CD28  
81 and anti-CD49d (BD FastImmune). Two hundred (200)  $\mu$ L of resuspended cells  
82 were used in each test. Stimulation with staphylococcal enterotoxin B (SEB, Sigma)  
83 (0.6  $\mu$ g/test) or DMSO (1.6%) (Sigma) is used as positive and negative controls  
84 respectively. After 2h of incubation at 37°C with 5% CO<sub>2</sub>, the secretion inhibitor  
85 containing monensin (GolgiStop™ BD Bioscience) is added to the samples and the

86 cells incubated for additional 3h. Stimulation is quenched by adding 2 mL of  
87 supplemented R10 to each tube. The cells are rested overnight at 4°C and stained in  
88 the following day with pre-determined concentrations of the following antibodies:  
89 LIVE/DEAD Far Red Cell Stain Kit (Invitrogen); anti-CD3 APCeFluor780 (clone SK7),  
90 anti-CD8 Alexa Fluor 700 (clone RPA-T8), anti-CD45RA PECy5 (clone HI100), anti-  
91 CCR7 PE (clone 3D12), anti-IFN $\gamma$  eFluor450 (clone 4S.B3), anti-IL-2 FITC (MQ1-  
92 17H12) (eBioscience); anti-CD4 BV510 (clone SK3) (BD Horizon); anti-TNF $\alpha$  PECy7  
93 (clone MAb11) (BD Pharmingen). Samples are acquired on an LSRII flow cytometer  
94 driven by the DiVa software package (BD Biosciences). Analysis of the acquired data  
95 is performed using FlowJo software (Tree Star, Inc.).

96

#### 97 **VZV-specific IgA and IgG detections**

98 Antibodies to VZV are quantified by an in-house direct enzyme-linked immunosorbent  
99 assay (ELISA) using 96 well high-binding Costar<sup>®</sup> plates (Corning Incorporate  
100 Corning NY, USA) coated with VZV glycoprotein (EastCoast Bio Inc, Maine, USA).  
101 Biotin-conjugated goat anti-human IgG (KPL, Gaithersburg, MD, USA) or biotin-  
102 conjugated goat anti-human IgA (KPL, Gaithersburg, MD, USA) in combination with  
103 Horseradish peroxidase streptavidin (HRP-streptavidin) (KPL, Gaithersburg, MD,  
104 USA) and 3,3',5,5'-Tetramethylbenzidine (TMB) Liquid Substrate (Sigma-Aldrich) is  
105 used to identify the VZV-specific immunoglobulins present in the human specimens  
106 (plasma, saliva and cervicovaginal and rectal secretions). The standardization and  
107 validation of this procedure for the different specimens are ongoing (manuscript under  
108 preparation).

109

110 **Measurement of Cytokines and Chemokines Concentrations**

111 Electro-chemiluminescence U-Plex system (Meso Scale Discovery) is used to  
112 measure the concentration of 14 cytokines (IL-1 $\alpha$ , IL-1 $\beta$ , IL-6, IL-8, IL-10, IL-17A,  
113 IFN $\gamma$ , GM-CSF, IP-10, MIP-1 $\alpha$ , MIP-1 $\beta$ , MIP-3 $\alpha$ , TNF- $\alpha$  and IL-4). All samples are run  
114 in duplicate following the manufactures' instructions.

115

116 **STORAGE OF BIOLOGICAL SAMPLES**

117 Biological samples are stored at KAVI-ICR, and the University of Toronto. Ancillary  
118 studies not described at KAVI-VZV-001 protocol will be subjected to analysis by the  
119 ethics boards and performed only upon their approval and only for samples whose  
120 donors agreed to their use for future unspecified research and have declared that in  
121 the Informed Consent Form.

122

123 **OUTCOMES FOR KAVI-VZV-001 TRIAL**

124 **Table 2S: Outcomes for KAVI-VZV-001 trial**

| <b>Outcome</b>                                                                                                    | <b>Hypothesis</b>                                                                                                   | <b>Outcome measure</b>                                                                                                                                        |
|-------------------------------------------------------------------------------------------------------------------|---------------------------------------------------------------------------------------------------------------------|---------------------------------------------------------------------------------------------------------------------------------------------------------------|
| <b>Primary:</b> Cervical mucosal immune activation after VZV-vaccination                                          | Vaccination against varicella does not result in elevated immune activation after 12 weeks of immunization          | Change in frequency of cervical CD38 <sup>+</sup> HLA-DR <sup>+</sup> CD4 <sup>+</sup> T cells 12 weeks after VZV vaccination compared to baseline            |
| <b>Secondary:</b><br>a) Effector VZV-specific CD8 <sup>+</sup> T cells at the rectal mucosa after VZV vaccination | Vaccination against varicella boosts effector VZV-specific CD8 <sup>+</sup> T cells response at rectal mucosa       | Change in frequency of rectal VZV-specific IFN $\gamma$ -producing CD8 <sup>+</sup> T <sub>EM</sub> cells 12 weeks after VZV vaccination compared to baseline |
| b) Pro-inflammatory cytokines/chemokines secretion after VZV-vaccination                                          | Vaccination against varicella does not result in elevated pro-inflammatory signature after 12 weeks of immunization | Change in level of pro-inflammatory cytokines/chemokines in blood, cervix and rectum measured at 12 weeks after VZV vaccination compared to baseline          |
| <b>Tertiary:</b><br>a) VZV-specific effector CD8 <sup>+</sup> T cells in blood after VZV vaccination              | Vaccination against varicella boosts effector CD8 <sup>+</sup> T cells response in blood                            | Change in frequency of IFN $\gamma$ -producing CD8 <sup>+</sup> T <sub>EM</sub> cells in blood 4 weeks after VZV vaccination compared to baseline             |

| Outcome                                                                                                                                                                | Hypothesis                                                                                                                                                                                                                                                           | Outcome measure                                                                                                                                                                                                                                                          |
|------------------------------------------------------------------------------------------------------------------------------------------------------------------------|----------------------------------------------------------------------------------------------------------------------------------------------------------------------------------------------------------------------------------------------------------------------|--------------------------------------------------------------------------------------------------------------------------------------------------------------------------------------------------------------------------------------------------------------------------|
| b) Memory phenotype and VZV-specific T cell function in blood and rectum                                                                                               | The levels of VZV-specific cellular responses vary during the study due to vaccination or VZV subclinical reactivation                                                                                                                                               | Memory phenotype and VZV-specific function in CD8 <sup>+</sup> and CD4 <sup>+</sup> T cells in blood and rectum longitudinally throughout the study.                                                                                                                     |
| c) Longitudinal immune activation profile in blood, cervix and rectum                                                                                                  | Immune activation is enhanced after vaccination against varicella, but it returns to basal levels within 12 weeks post-vaccination                                                                                                                                   | Expression of activation markers such as CD38, CD69, Ki67 and HLA-DR, HIV co-receptor CCR5 and mucosal homing markers in CD4 <sup>+</sup> T cells in blood, cervix and rectum longitudinally throughout the study.                                                       |
| d) Mucosal VZV-specific IgG and IgA antibodies after VZV vaccination                                                                                                   | Vaccination against varicella boosts mucosal VZV-specific humoral immune responses                                                                                                                                                                                   | Change in concentration of VZV-specific IgG and IgA in saliva, cervico-vaginal and rectal secretions 4 weeks after VZV vaccination compared to baseline                                                                                                                  |
| e) VZV-specific IgG and IgA antibodies in blood after VZV vaccination                                                                                                  | Vaccination against varicella boosts VZV-specific humoral immune responses in response in blood                                                                                                                                                                      | Change in concentration of VZV-specific IgG and IgA in blood 4 weeks after VZV vaccination compared to baseline                                                                                                                                                          |
| f) Longitudinal VZV-specific humoral responses in blood and mucosal secretions                                                                                         | The levels of VZV-specific humoral responses vary during the study due to vaccination or VZV subclinical reactivation                                                                                                                                                | VZV- specific IgG and IgA concentrations in plasma, saliva, cervico-vaginal and rectal secretions longitudinally throughout the study.                                                                                                                                   |
| <b>Exploratory:</b>                                                                                                                                                    |                                                                                                                                                                                                                                                                      |                                                                                                                                                                                                                                                                          |
| a) Immune correlations between different sampling sites (blood, cervix and rectum)                                                                                     | Some of the immune responses assessed are tightly correlated between sites, allowing for them to be used as surrogate markers in future clinical studies                                                                                                             | Correlation between immune responses assessed in different tissues including expression of activation markers such as CD38, CD69, Ki67 and HLA-DR, HIV co-receptor CCR5, mucosal homing markers in CD4 <sup>+</sup> T cells, cellular and humoral VZV-specific responses |
| b) Herpesviruses prevalence at KAVI-VZV-001 cohort                                                                                                                     | Epidemiological data on herpesviruses will shed some light on their prevalence in Africa                                                                                                                                                                             | Varicella-Zoster Virus (VZV), Herpes Virus-2 (HSV-2), Cytomagalovirus (CMV), Epstein Barr (EBV) at KAVI-VZV-001 cohort                                                                                                                                                   |
| c) Acceptability and feasibility of mucosal sampling at KAVI-VZV-001 cohort                                                                                            | Pre-screening sections adopted during recruitment phase promotes participants' awarness about the study objectives, procedures and their rights reducing the stress associated with some of the sampling procedures and promoting a good retention rate in the study | Acceptability and feasibility of mucosal sampling assessed by questionnaire and participant compliance to the study visits                                                                                                                                               |
| d) Association between Nugent scoring (used for bacterial vaginosis - BV - diagnostic), pro-inflammatory cytokine signature, cellular immune activation and microbiome | A portion of our study cohort changes their BV status during the study and we hypothesize that this change is associated with changes in pro-inflammatory cytokine, cellular immune activation and microbiome signatures                                             | Comparison between changes in BV nugen score and changes in pro-inflammatory cytokine, cellular immune activation and microbiome signatures (such as <i>Gardnerella</i> , <i>Prevotella</i> , <i>Mobiluncus</i> , <i>Sneathia sp</i> and <i>Lactobacillus sp</i> )       |
